# Supplementary material
Source: HighWire-hosted journal article supplement (https://www.g3journal.org/content/suppl/2012/02/06/2.2.299)
Supplement: FigureS10.pdf [file FigureS10.pdf]

### 3. Ribosomal DNA

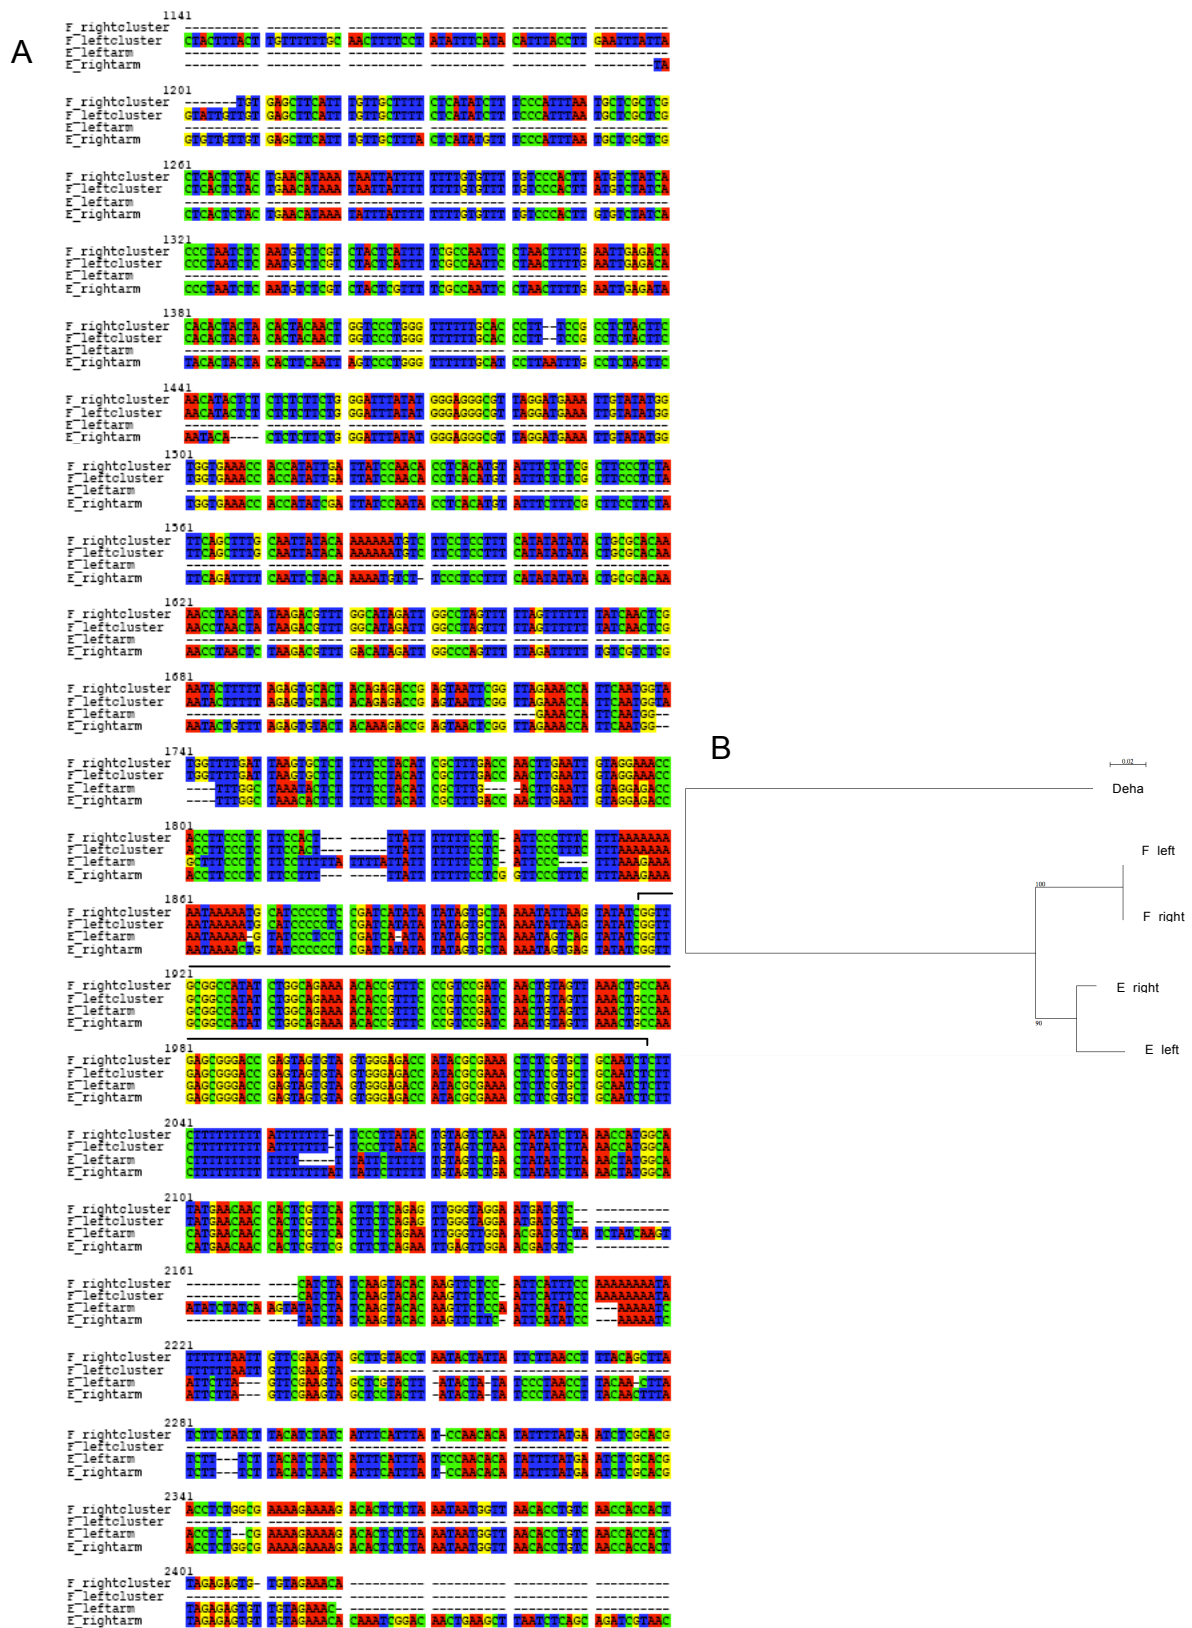

**Figure S10** Comparison of 5S rDNA sequences. (A) Multiple alignment of the rDNA loci performed with Muscle software (Edgard, 2004) and visualized with Jalview (Waterhouse *et al.*, 2009). E\_leftarm and E\_rightarm correspond to both rDNA loci on chr. E, F\_leftcluster and F\_rightcluster correspond to the 5S sequences flanking the 73 tandem repeats (Fig. 4). (B)

Phylogenetic tree calculated using the Bio-NJ distance method in Seaview (Gouy *et al.*, 2010) for 100 replicata and *D. hansenii* as outgroup.
